# Supplementary material for: Constrictive bronchiolitis in diffuse idiopathic pulmonary neuroendocrine cell hyperplasia
Source: PubMed Central journal article supplement — ERJ Open Res. 2020 Nov 16;6(4):00527-2020. doi: 10.1183/23120541.00527-2020 (PMC7682710; doi:10.1183/23120541.00527-2020), 2020-11-16
Supplement: 00527-2020.SUPPLEMENT.pdf [file 00527-2020.SUPPLEMENT.pdf]

**Supplementary table 1.** PFT characteristics for each PFT pattern

|                                                        |                 | <b>Normal</b> | <b>Obstructive</b> | <b>Restrictive</b> | <b>Mixed</b> | <b>Nonspecific</b> | <b>All groups</b> |
|--------------------------------------------------------|-----------------|---------------|--------------------|--------------------|--------------|--------------------|-------------------|
| <b>Number of patients</b>                              |                 | 2             | 23                 | 5                  | 4            | 10                 | 44                |
| <b>Severity based on FEV1 %predicted</b>               | FEV1 $\geq$ 70% | 2             | 3                  | 0                  | 0            | 3                  | 18% (8/44)        |
|                                                        | FEV1 60-69%     | 0             | 2                  | 0                  | 0            | 5                  | 16% (7/44)        |
|                                                        | FEV1 50-59%     | 0             | 7                  | 1                  | 1            | 2                  | 25% (11/44)       |
|                                                        | FEV1 35-49%     | 0             | 6                  | 4                  | 1            | 0                  | 25% (11/44)       |
|                                                        | FEV1 <35%       | 0             | 5                  | 0                  | 2            | 0                  | 16% (7/44)        |
| <b>Number of patients who had BD response assessed</b> |                 | 0             | 21                 | 5                  | 2            | 9                  | 37                |
| <b>BD response</b>                                     | Positive        | 0             | 11                 | 0                  | 1            | 1                  | 35% (13/37)       |
|                                                        | Negative        | 0             | 10                 | 5                  | 1            | 8                  | 65% (24/37)       |
| <b>Number of patients with RV measurement</b>          |                 | 2             | 22                 | 5                  | 4            | 10                 | 43                |
| <b>Air trapping</b>                                    | Present         | 0             | 20                 | 0                  | 2            | 2                  | 56% (24/43)       |
|                                                        | Absent          | 2             | 2                  | 5                  | 2            | 8                  | 44% (19/43)       |

**Abbreviations.** PFT: pulmonary function test. FEV1: Forced expiratory volume in the first second. BD: Bronchodilator. RV: residual volume.

**Supplementary table 2.** Patient characteristics, chest CT and biopsy findings based on the pulmonary function pattern

|                              |                                | Normal<br>(n=2) | Obstructive<br>(n=23) | Restrictive<br>(n=5) | Mixed (n=4) | Nonspecific<br>(n=10) | Overall<br>(n=44) |
|------------------------------|--------------------------------|-----------------|-----------------------|----------------------|-------------|-----------------------|-------------------|
| Smoking history              | Never                          | 1               | 15                    | 4                    | 4           | 8                     | 32 (73%)          |
|                              | Ex-smoker                      | 1               | 7                     | 1                    | 0           | 2                     | 11 (25%)          |
|                              | Current                        | 0               | 1                     | 0                    | 0           | 0                     | 1 (2%)            |
| History of<br>asthma or COPD | Yes                            | 0               | 15                    | 1                    | 2           | 2                     | 20 (45%)          |
|                              | No                             | 2               | 8                     | 4                    | 2           | 8                     | 24 (55%)          |
| Presenting<br>symptoms       | Cough                          | 1               | 17                    | 4                    | 2           | 6                     | 30 (68%)          |
|                              | Dyspnea                        | 0               | 7                     | 1                    | 3           | 2                     | 13 (30%)          |
|                              | Wheezing                       | 0               | 4                     | 0                    | 1           | 0                     | 5 (11%)           |
|                              | Incidental chest<br>CT finding | 1               | 1                     | 0                    | 0           | 4                     | 6 (14%)           |
|                              | Dysphonia                      | 0               | 0                     | 1                    | 0           | 0                     | 1 (2%)            |
| <b>Chest CT findings</b>     |                                |                 |                       |                      |             |                       |                   |
| Mosaic                       | Present                        | 0               | 18                    | 4                    | 4           | 7                     | 33 (75%)          |

|                            |                      |   |    |   |   |    |          |
|----------------------------|----------------------|---|----|---|---|----|----------|
| attenuation                | Absent               | 2 | 5  | 1 | 0 | 3  | 11 (25%) |
| Emphysema                  | Present              | 0 | 1  | 0 | 1 | 0  | 2 (5%)   |
|                            | Absent               | 2 | 22 | 5 | 3 | 10 | 42 (95%) |
| Interstitial fibrosis      | Present              | 0 | 2  | 1 | 1 | 0  | 4 (9%)   |
|                            | Absent               | 2 | 21 | 4 | 3 | 10 | 40 (91%) |
| <b>Biopsy findings</b>     |                      |   |    |   |   |    |          |
| Constrictive bronchiolitis | Present              | 1 | 10 | 1 | 2 | 7  | 21 (48%) |
|                            | Absent               | 1 | 12 | 4 | 2 | 2  | 21 (48%) |
|                            | NA                   | 0 | 1  | 0 | 0 | 1  | 2 (4%)   |
| Carcinoid tumor            | Present              | 2 | 6  | 3 | 1 | 4  | 16 (36%) |
|                            | Absent               | 0 | 16 | 2 | 3 | 5  | 26 (59%) |
|                            | NA                   | 0 | 1  | 0 | 0 | 1  | 2 (5%)   |
| Other biopsy findings      | Emphysema            | 1 | 5  | 0 | 0 | 0  | 6 (14%)  |
|                            | Organizing pneumonia | 0 | 0  | 2 | 0 | 1  | 3 (7%)   |
|                            | NSIP                 | 0 | 0  | 0 | 1 | 0  | 1 (2%)   |

|  |                              |   |   |   |   |   |         |
|--|------------------------------|---|---|---|---|---|---------|
|  | Respiratory<br>bronchiolitis | 0 | 1 | 0 | 0 | 0 | 1 (2%)  |
|  | Granulomas                   | 1 | 2 | 1 | 0 | 3 | 7 (16%) |

**Abbreviations.** COPD: Chronic obstructive pulmonary disease, NA: Not applicable, CT: Computed tomography, NSIP: Nonspecific interstitial pneumonia

**Supplementary table 3.** Treatments prescribed in our study population.

| <b>Treatments prescribed</b>                                          | <b>N (%)</b> |
|-----------------------------------------------------------------------|--------------|
| Inhaled B <sub>2</sub> agonist                                        | 21 (48)      |
| Inhaled corticosteroids                                               | 18 (41)      |
| Octreotide                                                            | 14 (32)      |
| Inhaled antimuscarinic agent                                          | 10 (23)      |
| Systemic steroids                                                     | 1 (2)        |
| Combination therapy with PD-L1 inhibitor,<br>everolimus + cabozatinib | 1 (2)        |
| Combination therapy with capecitabine +<br>temozolamide               | 1 (2)        |
| Azithromycin                                                          | 1 (2)        |

**Abbreviations.** B<sub>2</sub>: Beta-2. PD-L1: Programmed death–Ligand 1.
